# Supplementary material for: Synbiotic approach restores intestinal homeostasis and prolongs survival in leukaemic mice with cachexia
Source: PubMed Central journal article supplement — ISME J. 2015 Nov 27;10(6):1456–70. doi: 10.1038/ismej.2015.209 (PMC5029183; doi:10.1038/ismej.2015.209), 2015-11-27

## Main experiment

Consumption of *Lactobacillus reuteri* 100-23

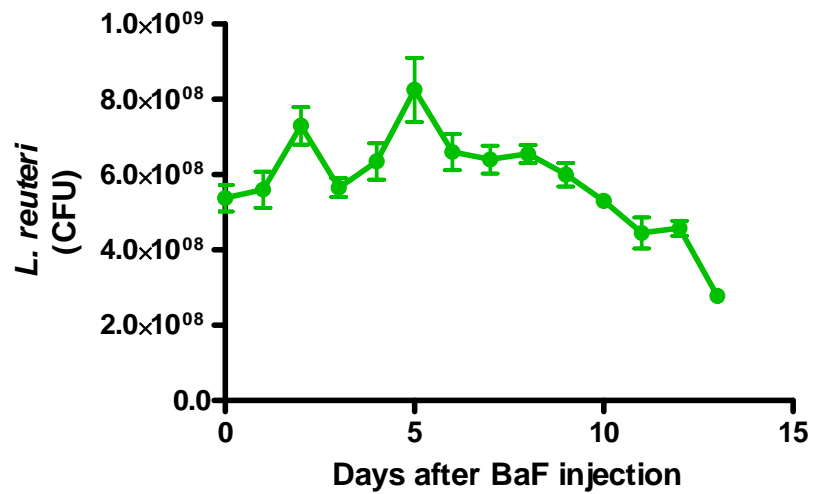

## Survival experiment

Consumption of *Lactobacillus reuteri* 100-23

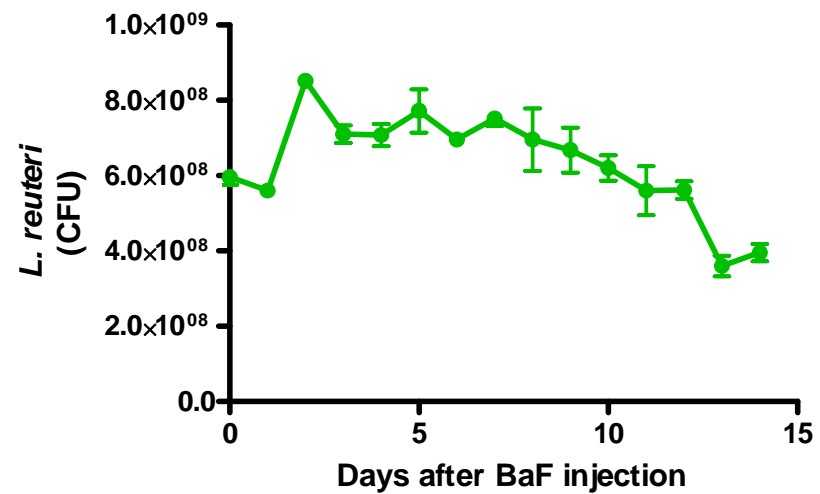

Supplement: ismej2015209x2.pdf [file ismej2015209x2.pdf]
