# Supplementary material for: Synbiotic approach restores intestinal homeostasis and prolongs survival in leukaemic mice with cachexia
Source: PubMed Central journal article supplement — ISME J. 2015 Nov 27;10(6):1456–70. doi: 10.1038/ismej.2015.209 (PMC5029183; doi:10.1038/ismej.2015.209), 2015-11-27
Supplement: ismej2015209x8.pdf [file ismej2015209x8.pdf]

CT BaF BaF-Lrl

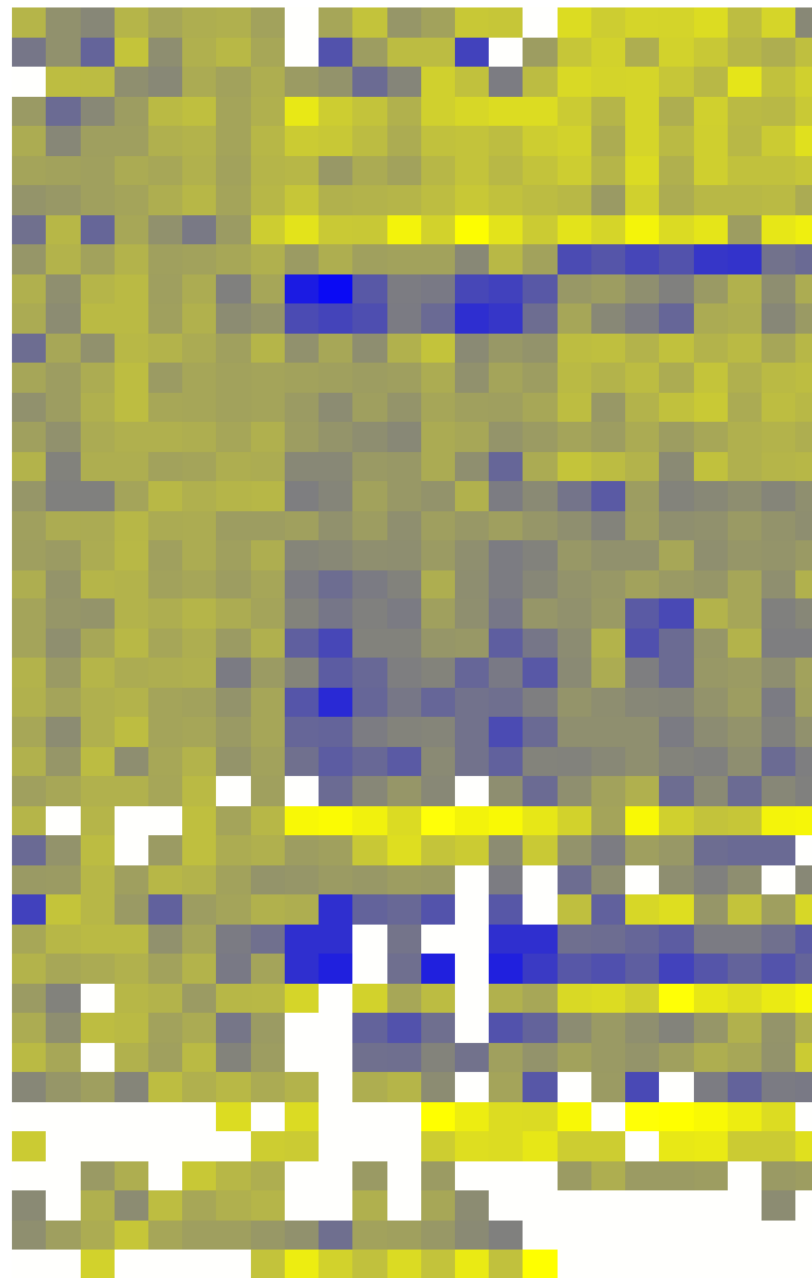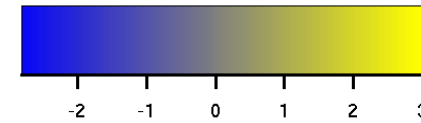

- segmented filamentous bacterium (185)
- Unclassified Clostridiales (157)
- Unclassified Lachnospiraceae (177)
- Bacteroides sp. ASF519 (2)
- Anaerotruncus sp. (21)
- Alistipes sp. (81)
- Alistipes finegoldii (5)
- Unclassified Alphaproteobacteria (6)
- Anaerotruncus colihominis (46)
- Unclassified Porphyromonadaceae (37)
- Barnesiella sp. (41)
- Unclassified Clostridiales (176)
- Unclassified Porphyromonadaceae (55)
- Unclassified Firmicutes (100)
- Unclassified Porphyromonadaceae (88)
- Barnesiella sp. (231)
- Clostridium lactatifermentans (202)
- Alistipes putredinis (35)
- Barnesiella sp. (173)
- Barnesiella sp. (30)
- Barnesiella sp. (73)
- Barnesiella sp. (16)
- Barnesiella sp. (133)
- Barnesiella sp. (23)
- Barnesiella sp. (56)
- Barnesiella sp. (44)
- Enterorhabdus mucosicola (355)
- Escherischia/Shigella (17)
- Anaerotruncus colihominis (209)
- Unclassified Lachnospiraceae (302)
- Clostridium XIVa sp. (71)
- Lactobacillus sp. (74)
- Lactobacillus johnsonii (54)
- Unclassified Lachnospiraceae (238)
- Unclassified Porphyromonadaceae (680)
- Parasutterella excrementihominis (T) (247)
- Unclassified Lachnospiraceae (740)
- Ruminococcus sp. (483)
- Alistipes sp. (389)
- Enterorhabdus caecimuris (321)
- Unclassified Coriobacteriaceae (498)
- Unclassified Firmicutes (323)
- Anaerotruncus colihominis (690)
