# Supplementary material for: Synbiotic approach restores intestinal homeostasis and prolongs survival in leukaemic mice with cachexia
Source: PubMed Central journal article supplement — ISME J. 2015 Nov 27;10(6):1456–70. doi: 10.1038/ismej.2015.209 (PMC5029183; doi:10.1038/ismej.2015.209), 2015-11-27
Supplement: ismej2015209x11.pdf [file ismej2015209x11.pdf]

**Table S1: primer sequences (mouse mRNA and bacterial DNA)**

| Gene/product                | Forward                     | Reverse                    | Amplicon length (bp) | Intron skipping ?                                                         | Splicing variants ?             |
|-----------------------------|-----------------------------|----------------------------|----------------------|---------------------------------------------------------------------------|---------------------------------|
| Bcr-Abl                     | TCCGCTGACCATCAATAAGGA       | CACTCAGACCCTGAGGCTCAA      | 74                   | no intron                                                                 | 1/1                             |
| Cathepsin L                 | GTGGACTGTTCTCACGCTCAAG      | TCCGTCCTTCGCTTCATAGG       | 129                  | yes                                                                       | 1/1                             |
| CD11b                       | GTCAGAGTCTGCCTCCGTGT        | CCTGCGTGTGTTGTTCTTTG       | 150                  | yes                                                                       | 2/2                             |
| CD11c                       | ACGTCAGTACAAGGAGATGTTGGA    | ATCCTATTGCAGAATGCTTCTTTACC | 190                  | no                                                                        | 1/1                             |
| CD3g                        | TCTCTACTGGGCTCTCTCAA        | CCATCTCCAAGGAAACCAAC       | 116                  | yes                                                                       | 1/1                             |
| CD68                        | CTTCCCACAGGCAGCACAG         | AATGATGAGAGGCAGCAAGAGG     | 235                  | yes                                                                       | ½ (the other is non coding RNA) |
| Ebi3                        | AGCAGCCTCCTAGCCTTTGT        | GGTAGCGGAGTCGGTACTTG       | 160                  | yes                                                                       | 1/1                             |
| F4/80                       | TGACAACCAGACGGCTTGTG        | CAGGCGAGGAAAAGATAGTGT      | 60                   | yes                                                                       | 1/1                             |
| Foxp3                       | TCCTTCCCAGAGTTCTTCCA        | CGAACATGCGAGTAAACCAA       | 157                  | yes                                                                       | 3/3                             |
| IFN $\gamma$                | AGCGGCTGACTGAACTCAGATTGTAG  | GTCACAGTTTTTCAGCTGTATAGGG  | 247                  | no                                                                        | 1/1                             |
| IL10                        | GGACAACATACTGCTAACCGAC      | AAAATCACTCTTCACCTGCTCG     | 256                  | yes                                                                       | 1/1                             |
| IL1b                        | TCGCTCAGGGTCACAAGAAA        | CATCAGAGGCAAGGAGGAAAAC     | 73                   | no                                                                        | 1/1                             |
| IL6                         | ACAAGTCGGAGGCTTAATTACACAT   | TTGCCATTGCACAACCTTTTTTC    | 72                   | yes                                                                       | 1/1                             |
| IL17A                       | AGGCCCTCAGACTACCTCAAC       | AGCTCTCAGGCTCCCTCTTC       | 202                  | yes                                                                       | 1/1                             |
| LC3                         | CACTGCTCTGTCTTGTGTAGTTG     | TCGTTGTGCCTTTATTAGTGCATC   | 171                  | no                                                                        | 1/1                             |
| Lysozyme 1                  | GCCAAGGTCTACAATCGTTGTGAGTTG | CAGTCAGCCAGCTTGACACCACG    | 86                   | yes                                                                       | 1/1                             |
| Muc2                        | ATGCCACCTCCTCAAAGAC         | GTAGTTTCCGTTGGAACAGTGAA    | 101                  | no intron                                                                 | 1/1                             |
| Occludin                    | ATGTCCGGCCGATGCTCTC         | TTTGCTGCTCTTGGGTCTGTAT     | 177                  | yes                                                                       | 1/1                             |
| Proglucagon                 | TGGCAGCACGCCCTTC            | GCGCTTCTGTCTGGGA           | 67                   | yes                                                                       | 1/1                             |
| Reg3g                       | TTCCTGTCCTCCATGATCAAA       | CATCCACCTCTGTTGGGTTC       | 101                  | yes                                                                       | 1/1                             |
| RPL19                       | GAAGGTCAAAGGGAATGTGTTCA     | CCTTGTCTGCCTTCAGCTTGT      | 74                   | no                                                                        | 2/2                             |
| Pla2g2a                     | AAGGATCCCCCAAGGATGCCAC      | CAGCCGTTTCTGACAGGAGTTCTGG  | 167                  | yes                                                                       | 1/1                             |
| Tbet/Tbx21                  | CAGTGTGGAAAGGCAGAAGG        | GGGCTGGTACTTGTGGAGAG       | 189                  | yes                                                                       | 1/1                             |
| TCF-4                       | ATGGCAAACAGAGGAACTGG        | GCCTGCTGAGAGTGAAGGAG       | 156                  | yes                                                                       | 2/2                             |
| TNF $\alpha$                | AGCCCCCAGTCTGTATCCTT        | GGTCACTGTCCCAGCATCTT       | 113                  | no                                                                        | 2/2                             |
| ZO-1                        | TTTTTGACAGGGGGAGTGG         | TGCTGCAGAGGTCAAAGTTCAAG    | 227                  | no                                                                        | 2/2                             |
|                             |                             |                            |                      |                                                                           |                                 |
| Defa ( $\alpha$ -defensins) | GGTGATCATCAGACCCCAGCATCAGT  | AAGAGACTAAAAGTGGAGCAGC     | 272/273              | These primers recognize several $\alpha$ -defensins. (Gulati et al, 2012) |                                 |

Intron skipping: the location of the primers is not indicated as it will be different from one splice variant to another.

Splicing variants: number of splicing variants recognized vs number of splicing variants in the NCBI database (does not take into account the predicted sequences).

| <b>Bacteria</b>                             | <b>Forward</b>            | <b>Reverse</b>              | <b>References</b>        | <b>Tan</b> | <b>Amplicon length (bp)</b> |
|---------------------------------------------|---------------------------|-----------------------------|--------------------------|------------|-----------------------------|
| Bacteria Universal P338F and P518r          | ACTCCTACGGGAGGCAGCAG      | ATTACCGCGGCTGCTGG           | (Ovreas et al, 1997)     | 60         | 195                         |
| <i>Lactobacillus</i> spp.                   | GAGGCAGCAGTAGGGAATCTTC    | GGCCAGTTACTACCTCTATCCTTCTTC | (Delroisse et al, 2008)  | 60         | 125                         |
| <i>Lactobacillus reuteri</i>                | ACCGAGAACACCGCGTTATTT     | ACCTAAACAATCAAAGATTGTCT     | (Haarman and Knol, 2006) | 59         | 304                         |
| <i>Enterobacteriaceae</i> ECO1457F/ECO1652R | CATTGACGTTACCCGCAGAAGAAGC | CTCTACGAGACTCAAGCTTGC       | (Bartosch et al, 2004)   | 60         | 193                         |
| <i>P.goldsteinii</i> /ASF519                | TTGCCGTTGAAACTGGTTGA      | GGAGTTCTGCGTGATATCTATGCA    | (Cahenzli et al, 2013)   | 60         | 90                          |

Tan: Annealing temperature, in Celsius.

## REFERENCES

Bartosch, S., Fite, A., Macfarlane, G.T., & McMurdo, M.E. 2004. Characterization of bacterial communities in feces from healthy elderly volunteers and hospitalized elderly patients by using real-time PCR and effects of antibiotic treatment on the fecal microbiota. *Appl.Environ.Microbiol.*, 70, (6) 3575-3581.

Cahenzli, J., Koller, Y., Wyss, M., Geuking, M.B., & McCoy, K.D. 2013. Intestinal microbial diversity during early-life colonization shapes long-term IgE levels. *Cell Host.Microbe*, 14, (5) 559-570.

Delroisse, J.M., Boulvin, A.L., Parmentier, I., Dauphin, R.D., Vandenbol, M., & Portetelle, D. 2008. Quantification of *Bifidobacterium* spp. and *Lactobacillus* spp. in rat fecal samples by real-time PCR. *Microbiol.Res.*, 163, (6) 663-670.

Gulati, A.S., Shanahan, M.T., Arthur, J.C., Grossniklaus, E., von Furstenberg, R.J., Kreuk, L., Henning, S.J., Jobin, C., & Sartor, R.B. 2012. Mouse background strain profoundly influences Paneth cell function and intestinal microbial composition. *PLoS.One.*, 7, (2) e32403.

Haarman, M. & Knol, J. 2006. Quantitative real-time PCR analysis of fecal *Lactobacillus* species in infants receiving a prebiotic infant formula. *Appl.Environ.Microbiol.*, 72, (4) 2359-2365.

Ovreas, L., Forney, L., Daae, F.L., & Torsvik, V. 1997. Distribution of bacterioplankton in meromictic Lake Saelenvannet, as determined by denaturing gradient gel electrophoresis of PCR-amplified gene fragments coding for 16S rRNA. *Appl.Environ.Microbiol.*, 63, (9) 3367-3373.
