# Supplementary material for: Synbiotic approach restores intestinal homeostasis and prolongs survival in leukaemic mice with cachexia
Source: PubMed Central journal article supplement — ISME J. 2015 Nov 27;10(6):1456–70. doi: 10.1038/ismej.2015.209 (PMC5029183; doi:10.1038/ismej.2015.209), 2015-11-27
Supplement: ismej2015209x12.pdf [file ismej2015209x12.pdf]

| OTU     | Family                       | %_hor Genus                     | %_hor BLAST/RDP_seqmatch            | fold increase | Robust_FDR_pv control (mean) | control (SEM) | C26 (mean)  | C26 (SEM)    |              |
|---------|------------------------------|---------------------------------|-------------------------------------|---------------|------------------------------|---------------|-------------|--------------|--------------|
| OTU_2   | Porphyromonadaceae           | 1 Parabacteroides               | 1 Parabacteroides goldsteini/ASF519 | 28,66         | 5,25E-33                     | 0,010691588   | 0,002859025 | 0,306424922  | 0,022640607  |
| OTU_692 | Ruminococcaceae              | 0,99 Oscillibacter              | 0,55                                | 0,03          | 1,34E-19                     | 0,000928054   | 0,000125956 | 2,84118E-05  | 1,42316E-05  |
| OTU_370 | Desulfotomobacteriaceae      | 0,1 Desulfotomobacter           | 0,08                                | 0,14          | 5,74E-19                     | 9,00247E-05   | 6,01E-06    | 1,25863E-05  | 6,57E-06     |
| OTU_690 | Ruminococcaceae              | 1 Anaerotruncus                 | 0,93 Anaerotruncus colihominis      | 272,46        | 3,37E-14                     | 8,27E-06      | 8,27E-06    | 0,002253298  | 0,000270596  |
| OTU_95  | Porphyromonadaceae           | 0,9 Barnesiella                 | 0,8                                 | 0,15          | 7,48E-14                     | 0,017571179   | 0,002375079 | 0,002698372  | 0,000595302  |
| OTU_13  | Ruminococcaceae              | 0,96 Oscillibacter              | 0,81                                | 0,17          | 1,14E-11                     | 0,034100259   | 0,003872723 | 0,005828646  | 0,001559099  |
| OTU_31  | Ruminococcaceae              | 1 Oscillibacter                 | 0,89                                | 0,05          | 2,46E-11                     | 0,012803057   | 0,001820474 | 0,000614179  | 0,000216355  |
| OTU_39  | Veillonellaceae              | 0,48 Zymophilus                 | 0,25                                | 0,04          | 1,99E-09                     | 0,020559354   | 0,003251331 | 0,000721309  | 0,000218332  |
| OTU_24  | Lachnospiraceae              | 0,97 Coprococcus                | 0,17                                | 0,00          | 4,70E-09                     | 0,09130305    | 0,01407281  | 6,57171E-05  | 4,06848E-05  |
| OTU_184 | Gracilibacteraceae           | 0,23 Gracilibacter              | 0,14                                | 0,08          | 2,95E-07                     | 0,000920733   | 0,000120697 | 7,16697E-05  | 2,47639E-05  |
| OTU_505 | Ruminococcaceae              | 0,9 Clostridium IV              | 0,42                                | 0,24          | 2,95E-07                     | 0,005495614   | 0,00076337  | 0,001325811  | 0,000184892  |
| OTU_362 | Lachnospiraceae              | 0,95 Anaerostipes               | 0,29                                | 0,00          | 3,33E-06                     | 0,001641083   | 0,000374096 | 3,09E-06     | 3,09E-06     |
| OTU_15  | Lachnospiraceae              | 0,84 Oribacterium               | 0,27                                | 0,07          | 1,65034E-05                  | 0,012106256   | 0,002419305 | 0,000886297  | 0,000326926  |
| OTU_215 | Lachnospiraceae              | 0,99 Moryella                   | 0,31                                | 0,17          | 0,000019829                  | 0,001037204   | 0,000160926 | 0,00017843   | 9,50537E-05  |
| OTU_281 | Lachnospiraceae              | 0,8 Lactonifactor               | 0,18                                | 0,10          | 2,26109E-05                  | 0,001876873   | 0,000732287 | 0,000191778  | 0,000123859  |
| OTU_141 | Ruminococcaceae              | 0,99 Pseudoflavonifractor       | 0,49                                | 0,12          | 3,17961E-05                  | 0,008545152   | 0,00174127  | 0,001007353  | 0,000153902  |
| OTU_227 | Lachnospiraceae              | 0,96 Shuttleworthia             | 0,23                                | 5,28          | 5,98597E-05                  | 0,000311977   | 0,000101362 | 0,001646678  | 0,000208101  |
| OTU_309 | Clostridiales_Incertae Sedis | 0,57 Anaerovorax                | 0,57                                | 0,04          | 5,98597E-05                  | 0,000405349   | 0,000110312 | 1,55149E-05  | 7,78E-06     |
| OTU_197 | Lachnospiraceae              | 0,89 Catonella                  | 0,28                                | 0,07          | 6,67003E-05                  | 0,001417741   | 0,00030345  | 0,000103635  | 3,34648E-05  |
| OTU_676 | Ruminococcaceae              | 1 Acetanaerobacterium           | 0,44                                | 0,27          | 0,000369873                  | 0,000240539   | 4,01095E-05 | 6,57026E-05  | 1,81068E-05  |
| OTU_157 | Veillonellaceae              | 0,26 Propionispira              | 0,2                                 | 0,02          | 0,000395386                  | 0,001962772   | 0,000488279 | 3,74067E-05  | 1,89745E-05  |
| OTU_1   | Deferribacteraceae           | 1 Mucispirillum                 | 1 Mucispirillum schaedleri/ASF457   | 1,72          | 0,000412384                  | 0,082728378   | 0,008419706 | 0,142443261  | 0,012507371  |
| OTU_89  | Clostridiaceae 1             | 0,08 Fervidicella               | 0,08                                | 0,01          | 0,000450968                  | 0,000901551   | 0,000230529 | 6,33E-06     | 6,33E-06     |
| OTU_11  | Bacteroidaceae               | 1 Bacteroides                   | 1 Bacteroides uniformis             | 99,80         | 0,000450968                  | 0,001503298   | 0,000259163 | 0,150029934  | 0,030273364  |
| OTU_7   | Lachnospiraceae              | 0,6 Lactonifactor               | 0,16                                | 0,03          | 0,000450968                  | 0,095202827   | 0,023558917 | 0,003241702  | 0,001571542  |
| OTU_758 | Ruminococcaceae              | 0,88 Pseudoflavonifractor       | 0,53                                | 0,04          | 0,000591673                  | 0,000535296   | 0,000116929 | 2,19803E-05  | 1,59865E-05  |
| OTU_77  | Lachnospiraceae              | 0,56 Lactonifactor              | 0,02                                | 0,03          | 0,000796824                  | 0,00943445    | 0,003523259 | 0,000328549  | 0,000108338  |
| OTU_23  | Porphyromonadaceae           | 0,85 Barnesiella                | 0,85                                | 0,24          | 0,000796824                  | 0,042074923   | 0,006181964 | 0,010177057  | 0,001849426  |
| OTU_54  | Lactobacillaceae             | 1 Lactobacillus                 | 1 Lactobacillus johnsonii/gasseri   | 0,23          | 0,000872596                  | 0,005194426   | 0,000927036 | 0,001178834  | 0,000551281  |
| OTU_757 | Veillonellaceae              | 0,41 Zymophilus                 | 0,23                                | 0,01          | 0,001843629                  | 0,000361683   | 0,000101245 | 3,18E-06     | 3,18E-06     |
| OTU_174 | Lachnospiraceae              | 0,94 Coprococcus                | 0,12                                | 0,34          | 0,002259362                  | 0,00137234    | 0,000235312 | 0,000467331  | 0,000108067  |
| OTU_101 | Lachnospiraceae              | 1 Clostridium XIVa              | 0,25                                | 0,03          | 0,003052326                  | 0,004331031   | 0,001235341 | 0,0001161    | 3,24596E-05  |
| OTU_218 | Ruminococcaceae              | 0,93 Ruminococcus               | 0,46                                | 0,18          | 0,00311791                   | 8,53936E-05   | 1,82018E-05 | 1,56759E-05  | 9,33E-06     |
| OTU_404 | Ruminococcaceae              | 0,99 Clostridium IV             | 0,63                                | 0,02          | 0,003421841                  | 0,000293595   | 8,51551E-05 | 6,26E-06     | 4,04E-06     |
| OTU_128 | Lachnospiraceae              | 0,96 Blautia                    | 0,29                                | 0,24          | 0,003645622                  | 0,002822305   | 0,000569335 | 0,000677414  | 0,000289382  |
| OTU_97  | Enterobacteriaceae           | 1 Salmonella                    | 0,6 Escherichia/Shigella            | 2698,45       | 0,003829977                  | 5,68E-06      | 5,68E-06    | 0,015327549  | 0,0004535798 |
| OTU_204 | Ruminococcaceae              | 0,8 Anaerotruncus               | 0,2                                 | 0,03          | 0,00396731                   | 0,001472901   | 0,000353891 | 5,01007E-05  | 1,83404E-05  |
| OTU_376 | Veillonellaceae              | 0,35 Propionispira              | 0,23                                | 0,02          | 0,00410176                   | 0,001195066   | 0,000354282 | 2,50083E-05  | 7,45E-06     |
| OTU_175 | Ruminococcaceae              | 1 Oscillibacter                 | 0,97                                | 0,38          | 0,004165616                  | 0,012840621   | 0,001470792 | 0,004880834  | 0,000992805  |
| OTU_65  | Lachnospiraceae              | 0,53 Marvinbryantia             | 0,22                                | 0,42          | 0,004936942                  | 0,005547818   | 0,001666451 | 0,00013748   | 4,31324E-05  |
| OTU_337 | Gracilibacteraceae           | 0,07 Lutispora                  | 0,05                                | 0,07          | 0,0005058896                 | 0,000843001   | 0,00023813  | 6,28402E-05  | 3,81873E-05  |
| OTU_152 | Lachnospiraceae              | 0,79 Clostridium XIVa           | 0,33                                | 0,16          | 0,005360071                  | 0,004800784   | 0,001164519 | 0,000761009  | 0,000466506  |
| OTU_420 | Eubacteriaceae               | 0,24 Garcella                   | 0,22                                | 0,02          | 0,005815567                  | 0,000131811   | 3,34306E-05 | 3,04E-06     | 3,04E-06     |
| OTU_331 | Gracilibacteraceae           | 0,36 Gracilibacter              | 0,25                                | 0,25          | 0,005830403                  | 0,000570059   | 0,000173523 | 0,000144187  | 3,84161E-05  |
| OTU_56  | Porphyromonadaceae           | 0,53 Barnesiella                | 0,32                                | 0,12          | 0,005851921                  | 0,004535608   | 0,001409505 | 0,000537318  | 0,00017759   |
| OTU_387 | Clostridiales_Incertae Sedis | 0,6 Anaerovorax                 | 0,58                                | 5,96          | 0,006730999                  | 6,02467E-05   | 2,01391E-05 | 0,000358912  | 0,000072249  |
| OTU_278 | Staphylococcaceae            | 1 Staphylococcus                | 1 Staphylococcus sp./sciuri         | 183,71        | 0,006786318                  | 1,16967E-05   | 7,94E-06    | 0,002148785  | 0,000673485  |
| OTU_105 | Ruminococcaceae              | 1 Anaerotruncus                 | 0,2 Clostridium/Ruminococcus (0,83) | 11,48         | 0,006927767                  | 0,00110377    | 0,000982576 | 0,012669922  | 0,003526661  |
| OTU_177 | Veillonellaceae              | 0,41 Propionispira              | 0,38                                | 0,09          | 0,007023589                  | 0,000522335   | 0,000148922 | 0,00004715   | 3,37629E-05  |
| OTU_116 | Lachnospiraceae              | 0,93 Coprococcus                | 0,68                                | 0,23          | 0,007707329                  | 0,002425949   | 0,000589279 | 0,000550752  | 0,000149831  |
| OTU_247 | Sutterellaceae               | 1 Parasutterella                | 1 Parasutterella excrementihominis  | 3,13          | 0,009619031                  | 0,001055128   | 0,000102858 | 0,003301469  | 0,000726316  |
| OTU_344 | Lachnospiraceae              | 0,49 Marvinbryantia             | 0,15                                | 0,04          | 0,009857593                  | 0,001254917   | 0,000398666 | 5,33385E-05  | 2,27004E-05  |
| OTU_70  | Gracilibacteraceae           | 0,19 Gracilibacter              | 0,09                                | 0,01          | 0,010030015                  | 0,016502175   | 0,004081238 | 0,000229132  | 8,59558E-05  |
| OTU_182 | Lachnospiraceae              | 0,99 Lachnospiraceae_incertae_s | 0,61                                | 0,02          | 0,010043472                  | 0,001643867   | 0,000540327 | 2,80546E-05  | 1,13777E-05  |
| OTU_730 | Lachnospiraceae              | 0,93 Anaerostipes               | 0,35                                | 0,00          | 0,010043472                  | 0,000718294   | 0,000239135 | 3,14E-06     | 3,14E-06     |
| OTU_782 | Ruminococcaceae              | 0,99 Flavonifractor             | 0,65                                | 0,10          | 0,011432882                  | 0,000245938   | 0,00007411  | 2,51046E-05  | 1,01485E-05  |
| OTU_100 | Clostridiaceae 1             | 0,32 Oxobacter                  | 0,26                                | 0,05          | 0,013660852                  | 0,001109295   | 0,000282951 | 5,24109E-05  | 1,68884E-05  |
| OTU_26  | Lachnospiraceae              | 0,67 Lachnobacterium            | 0,18                                | 0,00          | 0,018668509                  | 0,03452632    | 0,008270386 | 5,88595E-05  | 0,000027643  |
| OTU_239 | Lachnospiraceae              | 0,99 Lactonifactor              | 0,25                                | 0,04          | 0,024867375                  | 0,001217984   | 0,000427284 | 5,02071E-05  | 2,57404E-05  |
| OTU_140 | Lachnospiraceae              | 0,78 Johnsonella                | 0,33                                | 0,42          | 0,026099447                  | 0,00143437    | 0,000240431 | 0,000601888  | 0,000188581  |
| OTU_181 | Lachnospiraceae              | 0,98 Coprococcus                | 0,32                                | 0,02          | 0,028835339                  | 0,008447126   | 0,002847091 | 0,000184839  | 9,64758E-05  |
| OTU_25  | Gracilibacteraceae           | 0,28 Lutispora                  | 0,26                                | 0,29          | 0,028835339                  | 0,005712756   | 0,001461418 | 0,001666775  | 0,000390141  |
| OTU_389 | Clostridiales_Incertae Sedis | 0,3 Anaerovorax                 | 0,3                                 | 24,42         | 0,034616399                  | 0,000012126   | 8,40E-06    | 0,000296078  | 0,000106731  |
| OTU_503 | Ignavibacteriaceae           | 0,15 Ignavibacterium            | 0,15                                | disappear     | 0,03484864                   | 0,000102606   | 3,93292E-05 | 0            | 0            |
| OTU_17  | Enterobacteriaceae           | 1 Escherichia/Shigella          | 1 Escherichia/Shigella              | 4676,53       | 0,035441902                  | 2,03982E-05   | 1,19541E-05 | 0,095392777  | 0,027095283  |
| OTU_194 | Lachnospiraceae              | 0,98 Blautia                    | 0,46                                | 0,12          | 0,035441902                  | 0,000242099   | 8,20099E-05 | 2,79174E-05  | 9,24E-06     |
| OTU_58  | Lachnospiraceae              | 0,5 Clostridium XIVb            | 0,44                                | 0,19          | 0,03974854                   | 0,009383345   | 0,002930511 | 0,0001797478 | 0,000454889  |
| OTU_635 | Halobacteriaceae             | 0,09 Halarchaenum               | 0,03                                | appear        | 0,039982501                  | 0             | 0           | 1,85822E-05  | 5,64E-06     |
| OTU_159 | Lachnospiraceae              | 0,98 Lachnospiraceae_incertae_s | 0,2                                 | 0,15          | 0,041989315                  | 0,003326766   | 0,001050799 | 0,00048752   | 0,000295349  |
| OTU_644 | Lachnospiraceae              | 0,99 Lachnospiraceae_incertae_s | 0,23                                | appear        | 0,049432551                  | 0             | 0           | 2,18852E-05  | 8,40E-06     |
