# Supplementary material for: Synbiotic approach restores intestinal homeostasis and prolongs survival in leukaemic mice with cachexia
Source: PubMed Central journal article supplement — ISME J. 2015 Nov 27;10(6):1456–70. doi: 10.1038/ismej.2015.209 (PMC5029183; doi:10.1038/ismej.2015.209), 2015-11-27
Supplement: ismej2015209x13.pdf [file ismej2015209x13.pdf]

| name                           | rank     | Robust     | Control |       | BaF    |       | BaF-LrI |        |       |     |
|--------------------------------|----------|------------|---------|-------|--------|-------|---------|--------|-------|-----|
|                                |          | FDR_pvalue | mean    | SEM   | mean   | SEM   | mean    | SEM    |       |     |
| Actinobacteria                 | phylum   | 5.15E-004  | 0.076   | 0.011 | 0.024  | 0.007 | 0.113   | 0.033  | #     |     |
| Bacteroidetes                  | phylum   | 1.80E-002  | 39.041  | 2.345 | 29.800 | 2.169 | *       | 37.767 | 2.602 |     |
| Gammaproteobacteria            | class    | 6.34E-006  | 0.004   | 0.001 | 0.072  | 0.014 | *       | 0.034  | 0.011 | #   |
| Bacilli                        | class    | 6.34E-006  | 0.936   | 0.001 | 0.035  | 0.014 | *       | 0.074  | 0.011 | *   |
| Actinobacteria                 | class    | 5.15E-004  | 0.076   | 0.011 | 0.024  | 0.007 |         | 0.113  | 0.033 | #   |
| Negativicutes                  | class    | 8.65E-003  | 0.006   | 0.003 | 0.003  | 0.001 |         | 0.000  | 0.000 | *   |
| Betaproteobacteria             | class    | 1.07E-002  | 0.084   | 0.016 | 0.033  | 0.007 |         | 0.768  | 0.286 | # * |
| Sphingobacteria                | class    | 1.65E-002  | 0.004   | 0.001 | 0.001  | 0.000 |         | 0.003  | 0.001 |     |
| Deltaproteobacteria            | class    | 1.65E-002  | 0.595   | 0.001 | 0.309  | 0.000 | *       | 0.289  | 0.001 | *   |
| Bacteroidia                    | class    | 1.72E-002  | 37.584  | 2.225 | 28.473 | 2.119 | *       | 35.901 | 2.539 |     |
| Coriobacteridae                | subclass | 6.07E-004  | 0.066   | 0.010 | 0.019  | 0.007 | *       | 0.063  | 0.017 | #   |
| Enterobacteriales              | order    | 6.34E-006  | 0.004   | 0.001 | 0.071  | 0.014 | *       | 0.033  | 0.011 | #   |
| Lactobacillales                | order    | 6.34E-006  | 0.934   | 0.155 | 0.034  | 0.012 | *       | 0.072  | 0.005 | *   |
| Coriobacteriales               | order    | 6.07E-004  | 0.066   | 0.010 | 0.019  | 0.007 | *       | 0.063  | 0.017 | #   |
| Selenomonadales                | order    | 8.65E-003  | 0.006   | 0.003 | 0.003  | 0.001 |         | 0.000  | 0.000 | *   |
| Burkholderiales                | order    | 1.07E-002  | 0.084   | 0.016 | 0.033  | 0.007 |         | 0.767  | 0.286 | # * |
| Sphingobacteriales             | order    | 1.65E-002  | 0.004   | 0.001 | 0.001  | 0.000 |         | 0.003  | 0.001 |     |
| Desulfovibrionales             | order    | 1.65E-002  | 0.595   | 0.076 | 0.309  | 0.046 | *       | 0.289  | 0.037 | *   |
| Bacteroidales                  | order    | 1.72E-002  | 37.584  | 2.225 | 28.473 | 2.119 | *       | 35.901 | 2.539 |     |
| Clostridiales                  | order    | 4.80E-002  | 40.589  | 2.997 | 36.128 | 3.716 |         | 31.619 | 1.321 |     |
| Coriobacterineae               | suborder | 6.07E-004  | 0.066   | 0.010 | 0.019  | 0.007 | *       | 0.063  | 0.017 | #   |
| Enterobacteriaceae             | family   | 6.34E-006  | 0.004   | 0.154 | 0.071  | 0.013 | *       | 0.033  | 0.006 | #   |
| Lactobacillaceae               | family   | 6.34E-006  | 0.908   | 0.154 | 0.015  | 0.011 | *       | 0.053  | 0.006 | *   |
| Coriobacteriaceae              | family   | 6.07E-004  | 0.066   | 0.010 | 0.019  | 0.007 | *       | 0.063  | 0.017 | #   |
| Veillonellaceae                | family   | 3.85E-003  | 0.006   | 0.003 | 0.002  | 0.001 |         | 0.000  | 0.000 | *   |
| Sutterellaceae                 | family   | 5.07E-003  | 0.041   | 0.008 | 0.015  | 0.004 |         | 0.258  | 0.095 | # * |
| Chitinophagaceae               | family   | 1.65E-002  | 0.004   | 0.076 | 0.001  | 0.046 |         | 0.003  | 0.037 |     |
| Desulfovibrionaceae            | family   | 1.90E-002  | 0.591   | 0.078 | 0.309  | 0.047 | *       | 0.287  | 0.036 | *   |
| Barnesiella                    | genus    | 1.82E-012  | 2.465   | 0.363 | 0.436  | 0.068 | *       | 1.155  | 0.099 | *   |
| Escherichia/Shigella           | genus    | 5.67E-006  | 0.003   | 0.001 | 0.065  | 0.011 | *       | 0.031  | 0.010 | #   |
| Lactobacillus                  | genus    | 6.34E-006  | 0.906   | 0.153 | 0.015  | 0.011 | *       | 0.053  | 0.006 | *   |
| Anaerotruncus                  | genus    | 6.42E-004  | 0.001   | 0.001 | 0.010  | 0.003 | *       | 0.000  | 0.000 | #   |
| Enterorhabdus                  | genus    | 6.89E-004  | 0.006   | 0.002 | 0.001  | 0.000 | *       | 0.003  | 0.001 |     |
| Parabacteroides                | genus    | 2.67E-003  | 0.093   | 0.022 | 0.498  | 0.106 | *       | 0.299  | 0.072 |     |
| Blautia                        | genus    | 4.33E-003  | 0.011   | 0.002 | 0.005  | 0.002 | *       | 0.002  | 0.000 | *   |
| Parasutterella                 | genus    | 5.07E-003  | 0.041   | 0.008 | 0.015  | 0.004 |         | 0.258  | 0.095 | # * |
| Clostridium XIVb               | genus    | 1.07E-002  | 0.046   | 0.011 | 0.021  | 0.007 |         | 0.011  | 0.002 | *   |
| Sporobacter                    | genus    | 1.39E-002  | 0.007   | 0.002 | 0.026  | 0.017 |         | 0.001  | 0.000 |     |
| Bilophila                      | genus    | 1.90E-002  | 0.585   | 0.078 | 0.305  | 0.046 | *       | 0.284  | 0.036 | *   |
| unclassified_"Bacteroidales"   |          | 6.03E-005  | 16.885  | 2.120 | 7.926  | 0.935 | *       | 14.485 | 1.707 | #   |
| unclassified_"Proteobacteria"  |          | 6.03E-005  | 0.009   | 0.006 | 0.112  | 0.035 | *       | 0.109  | 0.025 | *   |
| unclassified_Bacteria          |          | 5.15E-004  | 6.105   | 0.758 | 12.353 | 1.801 | *       | 11.584 | 1.461 | *   |
| unclassified_Coriobacteriaceae |          | 1.55E-003  | 0.059   | 0.009 | 0.018  | 0.007 |         | 0.060  | 0.017 |     |
| unclassified_Veillonellaceae   |          | 3.85E-003  | 0.006   | 0.003 | 0.002  | 0.001 |         | 0.000  | 0.000 | *   |
| unclassified_"Rikenellaceae"   |          | 6.84E-003  | 0.012   | 0.007 | 0.005  | 0.002 |         | 0.018  | 0.003 |     |
