# Supplementary material for: Synbiotic approach restores intestinal homeostasis and prolongs survival in leukaemic mice with cachexia
Source: PubMed Central journal article supplement — ISME J. 2015 Nov 27;10(6):1456–70. doi: 10.1038/ismej.2015.209 (PMC5029183; doi:10.1038/ismej.2015.209), 2015-11-27
Supplement: ismej2015209x14.pdf [file ismej2015209x14.pdf]

| Identification |                                      | % hom | R_FDR_pvalue | CT    |       | BaF   |       | BaF-LrI |       |   |   |
|----------------|--------------------------------------|-------|--------------|-------|-------|-------|-------|---------|-------|---|---|
|                |                                      |       |              | mean  | SEM   | mean  | SEM   | mean    | SEM   |   |   |
| OTU_46         | Anaerotruncus colihominis            | 1     | 1.66E-16     | 0.549 | 0.073 | 0.476 | 0.088 | 0.021   | 0.007 | * | # |
| OTU_54         | Lactobacillus johnsonii              | 1     | 7.19E-15     | 0.604 | 0.093 | 0.010 | 0.007 | * 0.024 | 0.004 | * |   |
| OTU_23         | Barnesiella sp.                      | 1     | 1.55E-10     | 1.674 | 0.222 | 0.145 | 0.033 | * 0.678 | 0.119 | * | # |
| OTU_56         | Barnesiella sp.                      | 1     | 3.94E-10     | 0.797 | 0.165 | 0.097 | 0.023 | * 0.256 | 0.026 | * |   |
| OTU_323        | Unclassified Firmicutes              | 1     | 6.25E-10     | 0.024 | 0.007 | 0.009 | 0.002 | 0.000   | 0.000 | * |   |
| OTU_17         | Escherischia/Shigella                | 1     | 6.46E-06     | 0.003 | 0.001 | 0.065 | 0.011 | * 0.031 | 0.011 |   | # |
| OTU_37         | Unclassified Porphyromonadaceae      | 1     | 7.60E-06     | 2.884 | 0.599 | 0.155 | 0.067 | * 1.844 | 0.425 |   | # |
| OTU_21         | Anaerotruncus sp.                    | 0.963 | 7.75E-06     | 0.588 | 0.099 | 1.642 | 0.217 | 2.453   | 0.541 | * |   |
| OTU_133        | Barnesiella sp.                      | 0.938 | 1.13E-05     | 0.346 | 0.062 | 0.044 | 0.010 | * 0.166 | 0.040 | * |   |
| OTU_41         | Barnesiella sp.                      | 1     | 1.76E-05     | 2.757 | 0.651 | 0.140 | 0.052 | * 1.532 | 0.428 |   |   |
| OTU_6          | Unclassified Alphaproteobacteria     | 0.942 | 4.68E-05     | 0.337 | 0.161 | 3.640 | 1.137 | * 3.614 | 0.756 | * |   |
| OTU_680        | Unclassified Porphyromonadaceae      | 0.988 | 4.68E-05     | 0.076 | 0.019 | 0.003 | 0.001 | * 0.048 | 0.012 |   |   |
| OTU_173        | Barnesiella sp.                      | 1     | 7.29E-05     | 0.148 | 0.022 | 0.047 | 0.007 | * 0.076 | 0.010 | * |   |
| OTU_74         | Lactobacillus sp.                    | 1     | 1.55E-04     | 0.313 | 0.083 | 0.006 | 0.004 | * 0.030 | 0.005 | * |   |
| OTU_16         | Barnesiella sp.                      | 1     | 2.62E-04     | 2.258 | 0.366 | 0.464 | 0.151 | * 1.202 | 0.490 |   |   |
| OTU_55         | Unclassified Porphyromonadaceae      | 1     | 2.62E-04     | 0.377 | 0.068 | 0.273 | 0.026 | 0.714   | 0.084 | * | # |
| OTU_35         | Alistipes putredinis                 | 1     | 3.00E-04     | 1.220 | 0.150 | 0.691 | 0.062 | * 0.503 | 0.060 | * |   |
| OTU_2          | Bacteroides sp. ASF519               | 1     | 5.77E-04     | 0.083 | 0.024 | 0.497 | 0.106 | * 0.257 | 0.052 |   |   |
| OTU_44         | Barnesiella sp.                      | 1     | 8.34E-04     | 1.401 | 0.309 | 0.167 | 0.047 | * 0.325 | 0.045 | * |   |
| OTU_185        | segmented filamentous bacterium      | 1     | 9.96E-04     | 0.018 | 0.003 | 0.026 | 0.009 | 0.090   | 0.017 | * | # |
| OTU_302        | Unclassified Lachnospiraceae         | 1     | 1.36E-03     | 0.027 | 0.005 | 0.010 | 0.003 | * 0.005 | 0.001 | * |   |
| OTU_73         | Barnesiella sp.                      | 1     | 1.44E-03     | 0.230 | 0.035 | 0.069 | 0.017 | * 0.111 | 0.040 | * |   |
| OTU_231        | Barnesiella sp.                      | 1     | 1.79E-03     | 0.033 | 0.004 | 0.017 | 0.004 | 0.057   | 0.009 | * | # |
| OTU_81         | Alistipes sp.                        | 1     | 4.47E-03     | 0.116 | 0.013 | 0.191 | 0.034 | 0.390   | 0.078 | * | # |
| OTU_5          | Alistipes finegoldii                 | 1     | 5.05E-03     | 2.336 | 0.411 | 5.230 | 0.649 | * 4.402 | 1.106 |   |   |
| OTU_177        | Unclassified Lachnospiraceae         | 0.875 | 5.06E-03     | 0.027 | 0.008 | 0.036 | 0.016 | 0.139   | 0.028 | * | # |
| OTU_740        | Unclassified Lachnospiraceae         | 0.971 | 6.16E-03     | 0.121 | 0.031 | 0.082 | 0.029 | 0.017   | 0.008 | * |   |
| OTU_209        | Anaerotruncus colihominis            | 1     | 8.01E-03     | 0.029 | 0.009 | 0.085 | 0.026 | 0.007   | 0.003 |   | # |
| OTU_247        | Parasutterella excrementihominis (T) | 1     | 1.34E-02     | 0.022 | 0.006 | 0.005 | 0.002 | 0.024   | 0.009 |   |   |
| OTU_100        | Unclassified Firmicutes              | 1     | 1.62E-02     | 0.174 | 0.033 | 0.116 | 0.013 | 0.337   | 0.061 | * | # |
| OTU_176        | Unclassified Clostridiales           | 1     | 1.62E-02     | 0.100 | 0.021 | 0.087 | 0.030 | 0.181   | 0.019 |   | # |
| OTU_238        | Unclassified Lachnospiraceae         | 1     | 1.62E-02     | 0.012 | 0.003 | 0.024 | 0.009 | 0.171   | 0.051 | * | # |
| OTU_483        | Ruminococcus sp.                     | 1     | 1.62E-02     | 0.000 | 0.000 | 0.003 | 0.001 | 0.005   | 0.002 | * |   |
| OTU_30         | Barnesiella sp.                      | 1     | 1.72E-02     | 2.367 | 0.336 | 0.771 | 0.310 | * 1.614 | 0.273 |   |   |
| OTU_157        | Unclassified Clostridiales           | 1     | 1.74E-02     | 0.153 | 0.055 | 0.104 | 0.048 | 0.447   | 0.088 | * | # |

|         |                                 |       |          |       |       |       |       |   |       |       |   |
|---------|---------------------------------|-------|----------|-------|-------|-------|-------|---|-------|-------|---|
| OTU_690 | Anaerotruncus colihominis       | 1     | 1.74E-02 | 0.001 | 0.001 | 0.009 | 0.003 | * | 0.000 | 0.000 | # |
| OTU_321 | Enterorhabdus caecimuris        | 0.97  | 1.76E-02 | 0.004 | 0.002 | 0.001 | 0.000 |   | 0.002 | 0.000 |   |
| OTU_355 | Enterorhabdus mucosicola        | 0.962 | 1.76E-02 | 0.027 | 0.005 | 0.005 | 0.002 | * | 0.011 | 0.004 | * |
| OTU_389 | Alistipes sp.                   | 1     | 1.76E-02 | 0.001 | 0.000 | 0.003 | 0.001 |   | 0.004 | 0.001 | * |
| OTU_498 | Unclassified Coriobacteriaceae  | 0.949 | 2.55E-02 | 0.007 | 0.002 | 0.002 | 0.001 | * | 0.000 | 0.000 | * |
| OTU_71  | Clostridium XIVa sp.            | 1     | 3.47E-02 | 0.305 | 0.101 | 0.054 | 0.045 |   | 1.041 | 0.342 | # |
| OTU_202 | Clostridium lactatifermentans   | 0.971 | 4.42E-02 | 0.165 | 0.038 | 0.081 | 0.023 |   | 0.046 | 0.010 | * |
| OTU_88  | Unclassified Porphyromonadaceae | 1     | 4.42E-02 | 0.230 | 0.025 | 0.137 | 0.023 | * | 0.229 | 0.024 | # |
