# Supplementary material for: Synbiotic approach restores intestinal homeostasis and prolongs survival in leukaemic mice with cachexia
Source: PubMed Central journal article supplement — ISME J. 2015 Nov 27;10(6):1456–70. doi: 10.1038/ismej.2015.209 (PMC5029183; doi:10.1038/ismej.2015.209), 2015-11-27
Supplement: ismej2015209x15.pdf [file ismej2015209x15.pdf]

**Pearson's r**

|             | P. goldsteini/ASF519 (2) | Alistipes finegoldii (5) | Barnesiella sp. (16) | Escherischia (17) | Barnesiella sp. (23) | Unc. Porphyromonadaceae (37) | Barnesiella sp. (41) | Barnesiella sp. (44) | Lactobacillus johnsonii (54) | Clostridium XIVa sp. (71) | Barnesiella sp. (73) | Lactobacillus sp. (74) | Unc. Porphyromonadaceae (88) | Barnesiella sp. (133) | Parasutterella excrementihominis (T) (247) | Unclass. Lachnospiraceae (302) | Enterorhabdus caecimuris (321) | Enterorhabdus mucosicola (355) | Unc. Porphyromonadaceae (680) |
|-------------|--------------------------|--------------------------|----------------------|-------------------|----------------------|------------------------------|----------------------|----------------------|------------------------------|---------------------------|----------------------|------------------------|------------------------------|-----------------------|--------------------------------------------|--------------------------------|--------------------------------|--------------------------------|-------------------------------|
| occludin    | -0,29                    | -0,33                    | 0,19                 | -0,56             | 0,38                 | 0,34                         | 0,43                 | 0,44                 | 0,25                         | 0,19                      | 0,16                 | 0,34                   | 0,28                         | 0,47                  | 0,07                                       | 0,36                           | 0,08                           | 0,19                           | 0,40                          |
| ZO1         | -0,33                    | -0,18                    | 0,27                 | -0,42             | 0,36                 | 0,35                         | 0,36                 | 0,27                 | 0,24                         | 0,22                      | 0,24                 | 0,24                   | 0,61                         | 0,34                  | 0,15                                       | 0,20                           | 0,19                           | 0,13                           | 0,37                          |
| Muc2        | -0,46                    | -0,33                    | 0,28                 | -0,62             | 0,43                 | 0,41                         | 0,43                 | 0,43                 | 0,24                         | 0,29                      | 0,22                 | 0,33                   | 0,40                         | 0,45                  | 0,13                                       | 0,29                           | 0,21                           | 0,22                           | 0,44                          |
| proglucagon | 0,06                     | 0,08                     | -0,24                | 0,07              | -0,14                | -0,08                        | -0,08                | -0,13                | -0,20                        | 0,33                      | -0,37                | -0,11                  | 0,11                         | -0,11                 | -0,17                                      | -0,11                          | -0,28                          | -0,23                          | -0,03                         |
| TCF4        | -0,37                    | -0,20                    | 0,35                 | -0,57             | 0,48                 | 0,48                         | 0,47                 | 0,48                 | 0,42                         | 0,20                      | 0,34                 | 0,29                   | 0,37                         | 0,52                  | 0,36                                       | 0,17                           | 0,46                           | 0,40                           | 0,42                          |
| lysosyme    | -0,49                    | -0,46                    | 0,30                 | -0,38             | 0,52                 | 0,45                         | 0,35                 | 0,38                 | 0,28                         | 0,22                      | 0,13                 | 0,32                   | 0,37                         | 0,40                  | 0,17                                       | 0,37                           | -0,05                          | 0,15                           | 0,51                          |
| adef        | -0,35                    | -0,35                    | 0,15                 | -0,31             | 0,27                 | 0,19                         | 0,15                 | 0,15                 | 0,05                         | 0,13                      | 0,02                 | 0,08                   | 0,27                         | 0,18                  | -0,05                                      | 0,20                           | -0,19                          | -0,03                          | 0,24                          |
| Reg3g       | -0,59                    | -0,49                    | 0,70                 | -0,68             | 0,70                 | 0,68                         | 0,69                 | 0,68                 | 0,62                         | -0,03                     | 0,50                 | 0,70                   | 0,29                         | 0,72                  | 0,12                                       | 0,61                           | 0,28                           | 0,57                           | 0,69                          |
| PLA2        | -0,55                    | -0,58                    | 0,36                 | -0,43             | 0,55                 | 0,53                         | 0,42                 | 0,33                 | 0,27                         | 0,24                      | 0,22                 | 0,30                   | 0,47                         | 0,48                  | 0,34                                       | 0,27                           | 0,13                           | 0,14                           | 0,55                          |
| IL6         | 0,04                     | 0,28                     | -0,41                | 0,16              | -0,43                | -0,34                        | -0,34                | -0,44                | -0,41                        | 0,15                      | -0,48                | -0,36                  | -0,38                        | -0,38                 | -0,20                                      | -0,38                          | -0,20                          | -0,11                          | -0,37                         |
| TNFa        | -0,13                    | 0,32                     | 0,18                 | -0,21             | 0,25                 | 0,29                         | 0,28                 | 0,13                 | 0,18                         | 0,30                      | 0,25                 | 0,17                   | 0,32                         | 0,10                  | 0,06                                       | -0,10                          | 0,10                           | 0,36                           | 0,22                          |
| IFNg        | -0,50                    | -0,28                    | 0,40                 | -0,47             | 0,44                 | 0,43                         | 0,51                 | 0,45                 | 0,48                         | 0,00                      | 0,50                 | 0,51                   | 0,33                         | 0,41                  | 0,20                                       | 0,35                           | 0,42                           | 0,43                           | 0,40                          |
| IL1b        | -0,44                    | -0,24                    | 0,39                 | -0,46             | 0,72                 | 0,60                         | 0,53                 | 0,46                 | 0,71                         | 0,13                      | 0,43                 | 0,55                   | 0,31                         | 0,57                  | 0,54                                       | 0,13                           | 0,22                           | 0,51                           | 0,50                          |
| CD11b       | -0,51                    | -0,32                    | 0,56                 | -0,60             | 0,68                 | 0,68                         | 0,68                 | 0,63                 | 0,72                         | 0,05                      | 0,63                 | 0,52                   | 0,49                         | 0,68                  | 0,49                                       | 0,44                           | 0,63                           | 0,64                           | 0,60                          |
| F4.80       | -0,24                    | 0,07                     | -0,03                | -0,23             | -0,06                | 0,08                         | 0,01                 | 0,06                 | -0,15                        | 0,61                      | -0,08                | -0,14                  | 0,18                         | -0,03                 | 0,15                                       | -0,11                          | 0,30                           | 0,01                           | 0,08                          |
| CD68        | -0,28                    | 0,19                     | -0,17                | -0,11             | -0,03                | 0,02                         | 0,00                 | 0,13                 | 0,04                         | 0,49                      | -0,15                | 0,01                   | 0,16                         | 0,00                  | 0,04                                       | 0,05                           | 0,33                           | 0,31                           | 0,01                          |
| CD11c       | -0,67                    | -0,43                    | 0,36                 | -0,59             | 0,64                 | 0,61                         | 0,60                 | 0,76                 | 0,56                         | 0,27                      | 0,15                 | 0,61                   | 0,16                         | 0,70                  | 0,11                                       | 0,57                           | 0,27                           | 0,58                           | 0,66                          |
| CD3g        | -0,51                    | -0,32                    | 0,56                 | -0,60             | 0,68                 | 0,68                         | 0,68                 | 0,63                 | 0,72                         | 0,05                      | 0,63                 | 0,52                   | 0,49                         | 0,68                  | 0,49                                       | 0,44                           | 0,63                           | 0,64                           | 0,60                          |
| IL17A       | -0,57                    | -0,43                    | 0,60                 | -0,65             | 0,68                 | 0,53                         | 0,52                 | 0,61                 | 0,69                         | -0,18                     | 0,68                 | 0,45                   | 0,34                         | 0,56                  | 0,22                                       | 0,46                           | 0,48                           | 0,43                           | 0,42                          |
| Tbet        | -0,41                    | -0,22                    | 0,34                 | -0,42             | 0,52                 | 0,55                         | 0,56                 | 0,45                 | 0,55                         | 0,18                      | 0,54                 | 0,42                   | 0,43                         | 0,51                  | 0,61                                       | 0,24                           | 0,68                           | 0,57                           | 0,47                          |
| Foxp3       | -0,32                    | -0,04                    | 0,11                 | -0,38             | 0,32                 | 0,27                         | 0,33                 | 0,08                 | 0,27                         | 0,08                      | 0,16                 | 0,23                   | 0,07                         | 0,21                  | 0,24                                       | -0,21                          | 0,04                           | 0,37                           | 0,16                          |
| IL10        | -0,52                    | -0,27                    | 0,40                 | -0,65             | 0,52                 | 0,50                         | 0,61                 | 0,46                 | 0,52                         | 0,01                      | 0,47                 | 0,42                   | 0,21                         | 0,52                  | 0,30                                       | 0,26                           | 0,40                           | 0,57                           | 0,41                          |
| Ebi3        | 0,06                     | 0,23                     | -0,17                | -0,03             | -0,07                | 0,06                         | 0,04                 | -0,20                | -0,20                        | 0,32                      | -0,22                | -0,17                  | 0,09                         | -0,03                 | 0,17                                       | -0,34                          | 0,07                           | 0,06                           | 0,00                          |

**Adjusted p-values**

|             | P. goldsteini/ASF519 (2) | Alistipes finegoldii (5) | Barnesiella sp. (16) | Escherischia (17) | Barnesiella sp. (23) | Unc. Porphyromonadaceae (37) | Barnesiella sp. (41) | Barnesiella sp. (44) | Lactobacillus johnsonii (54) | Clostridium XIVa sp. (71) | Barnesiella sp. (73) | Lactobacillus sp. (74) | Unc. Porphyromonadaceae (88) | Barnesiella sp. (133) | Parasutterella excrementihominis (T) (247) | Unclass. Lachnospiraceae (302) | Enterorhabdus caecimuris (321) | Enterorhabdus mucosicola (355) | Unc. Porphyromonadaceae (680) |
|-------------|--------------------------|--------------------------|----------------------|-------------------|----------------------|------------------------------|----------------------|----------------------|------------------------------|---------------------------|----------------------|------------------------|------------------------------|-----------------------|--------------------------------------------|--------------------------------|--------------------------------|--------------------------------|-------------------------------|
| occludin    | 0,40                     | 0,33                     | 0,61                 | 0,06              | 0,24                 | 0,32                         | 0,17                 | 0,16                 | 0,48                         | 0,61                      | 0,69                 | 0,32                   | 0,42                         | 0,12                  | 0,88                                       | 0,28                           | 0,85                           | 0,60                           | 0,21                          |
| ZO1         | 0,33                     | 0,64                     | 0,44                 | 0,18              | 0,29                 | 0,29                         | 0,28                 | 0,45                 | 0,51                         | 0,56                      | 0,50                 | 0,52                   | 0,03                         | 0,31                  | 0,70                                       | 0,58                           | 0,62                           | 0,75                           | 0,26                          |
| Muc2        | 0,13                     | 0,33                     | 0,42                 | 0,03              | 0,18                 | 0,19                         | 0,17                 | 0,17                 | 0,51                         | 0,40                      | 0,55                 | 0,34                   | 0,20                         | 0,15                  | 0,76                                       | 0,41                           | 0,56                           | 0,55                           | 0,16                          |
| proglucagon | 0,88                     | 0,85                     | 0,50                 | 0,87              | 0,72                 | 0,85                         | 0,86                 | 0,75                 | 0,59                         | 0,34                      | 0,26                 | 0,80                   | 0,80                         | 0,78                  | 0,66                                       | 0,79                           | 0,42                           | 0,54                           | 0,95                          |
| TCF4        | 0,26                     | 0,58                     | 0,31                 | 0,05              | 0,12                 | 0,11                         | 0,12                 | 0,11                 | 0,18                         | 0,60                      | 0,32                 | 0,42                   | 0,27                         | 0,08                  | 0,27                                       | 0,65                           | 0,13                           | 0,21                           | 0,18                          |
| lysosyme    | 0,10                     | 0,13                     | 0,39                 | 0,25              | 0,08                 | 0,14                         | 0,29                 | 0,24                 | 0,43                         | 0,55                      | 0,75                 | 0,35                   | 0,26                         | 0,20                  | 0,67                                       | 0,26                           | 0,91                           | 0,70                           | 0,09                          |
| adef        | 0,29                     | 0,30                     | 0,71                 | 0,36              | 0,45                 | 0,60                         | 0,70                 | 0,70                 | 0,92                         | 0,75                      | 0,97                 | 0,86                   | 0,43                         | 0,63                  | 0,91                                       | 0,59                           | 0,62                           | 0,95                           | 0,50                          |
| Reg3g       | 0,04                     | 0,10                     | 0,01                 | 0,01              | 0,01                 | 0,01                         | 0,01                 | 0,01                 | 0,03                         | 0,95                      | 0,09                 | 0,01                   | 0,41                         | 0,01                  | 0,77                                       | 0,03                           | 0,42                           | 0,05                           | 0,01                          |
| PLA2        | 0,06                     | 0,05                     | 0,29                 | 0,17              | 0,06                 | 0,08                         | 0,18                 | 0,33                 | 0,44                         | 0,51                      | 0,55                 | 0,38                   | 0,12                         | 0,11                  | 0,32                                       | 0,45                           | 0,75                           | 0,74                           | 0,06                          |
| IL6         | 0,94                     | 0,43                     | 0,20                 | 0,69              | 0,18                 | 0,33                         | 0,33                 | 0,17                 | 0,20                         | 0,71                      | 0,12                 | 0,29                   | 0,26                         | 0,26                  | 0,60                                       | 0,26                           | 0,61                           | 0,79                           | 0,27                          |
| TNFa        | 0,76                     | 0,35                     | 0,64                 | 0,57              | 0,48                 | 0,42                         | 0,43                 | 0,75                 | 0,66                         | 0,39                      | 0,50                 | 0,68                   | 0,37                         | 0,80                  | 0,89                                       | 0,81                           | 0,82                           | 0,29                           | 0,55                          |
| IFNg        | 0,09                     | 0,42                     | 0,20                 | 0,12              | 0,16                 | 0,17                         | 0,08                 | 0,14                 | 0,11                         | 1,00                      | 0,09                 | 0,09                   | 0,34                         | 0,18                  | 0,58                                       | 0,30                           | 0,18                           | 0,17                           | 0,20                          |
| IL1b        | 0,16                     | 0,50                     | 0,21                 | 0,13              | 0,01                 | 0,04                         | 0,08                 | 0,13                 | 0,01                         | 0,75                      | 0,17                 | 0,06                   | 0,36                         | 0,05                  | 0,07                                       | 0,76                           | 0,55                           | 0,09                           | 0,10                          |
| CD11b       | 0,09                     | 0,35                     | 0,05                 | 0,04              | 0,01                 | 0,01                         | 0,01                 | 0,03                 | 0,01                         | 0,90                      | 0,02                 | 0,08                   | 0,10                         | 0,01                  | 0,10                                       | 0,16                           | 0,02                           | 0,02                           | 0,04                          |
| F4.80       | 0,53                     | 0,88                     | 0,95                 | 0,55              | 0,88                 | 0,86                         | 0,98                 | 0,89                 | 0,72                         | 0,04                      | 0,86                 | 0,75                   | 0,64                         | 0,95                  | 0,70                                       | 0,80                           | 0,41                           | 0,98                           | 0,86                          |
| CD68        | 0,43                     | 0,63                     | 0,67                 | 0,79              | 0,95                 | 0,96                         | 1,00                 | 0,76                 | 0,94                         | 0,12                      | 0,71                 | 0,99                   | 0,70                         | 1,00                  | 0,94                                       | 0,91                           | 0,34                           | 0,37                           | 0,98                          |
| CD11c       | 0,02                     | 0,18                     | 0,29                 | 0,05              | 0,03                 | 0,04                         | 0,04                 | 0,01                 | 0,06                         | 0,46                      | 0,71                 | 0,04                   | 0,69                         | 0,01                  | 0,79                                       | 0,05                           | 0,46                           | 0,05                           | 0,02                          |
| CD3g        | 0,09                     | 0,35                     | 0,05                 | 0,04              | 0,01                 | 0,01                         | 0,01                 | 0,03                 | 0,01                         | 0,90                      | 0,02                 | 0,08                   | 0,10                         | 0,01                  | 0,10                                       | 0,16                           | 0,02                           | 0,02                           | 0,04                          |
| IL17A       | 0,06                     | 0,18                     | 0,04                 | 0,02              | 0,01                 | 0,08                         | 0,08                 | 0,04                 | 0,01                         | 0,64                      | 0,01                 | 0,16                   | 0,32                         | 0,06                  | 0,55                                       | 0,14                           | 0,12                           | 0,18                           | 0,18                          |
| Tbet        | 0,19                     | 0,55                     | 0,32                 | 0,18              | 0,08                 | 0,06                         | 0,05                 | 0,15                 | 0,06                         | 0,64                      | 0,07                 | 0,18                   | 0,17                         | 0,08                  | 0,03                                       | 0,51                           | 0,01                           | 0,05                           | 0,12                          |
| Foxp3       | 0,37                     | 0,94                     | 0,80                 | 0,26              | 0,35                 | 0,45                         | 0,35                 | 0,85                 | 0,46                         | 0,85                      | 0,69                 | 0,55                   | 0,86                         | 0,57                  | 0,51                                       | 0,57                           | 0,94                           | 0,28                           | 0,69                          |
| IL10        | 0,08                     | 0,44                     | 0,20                 | 0,02              | 0,08                 | 0,10                         | 0,04                 | 0,13                 | 0,08                         | 0,99                      | 0,12                 | 0,18                   | 0,56                         | 0,08                  | 0,39                                       | 0,46                           | 0,20                           | 0,05                           | 0,20                          |
| Ebi3        | 0,90                     | 0,54                     | 0,68                 | 0,95              | 0,86                 | 0,88                         | 0,94                 | 0,59                 | 0,61                         | 0,37                      | 0,57                 | 0,66                   | 0,82                         | 0,95                  | 0,66                                       | 0,32                           | 0,86                           | 0,89                           | 0,99                          |
