# Supplementary figures and images for: Synbiotic approach restores intestinal homeostasis and prolongs survival in leukaemic mice with cachexia
Source: PubMed Central journal article supplement — ISME J. 2015 Nov 27;10(6):1456–70. doi: 10.1038/ismej.2015.209 (PMC5029183; doi:10.1038/ismej.2015.209), 2015-11-27

**A**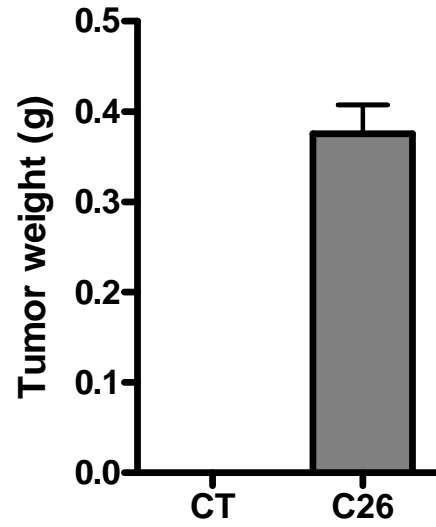**B****White adipose tissues**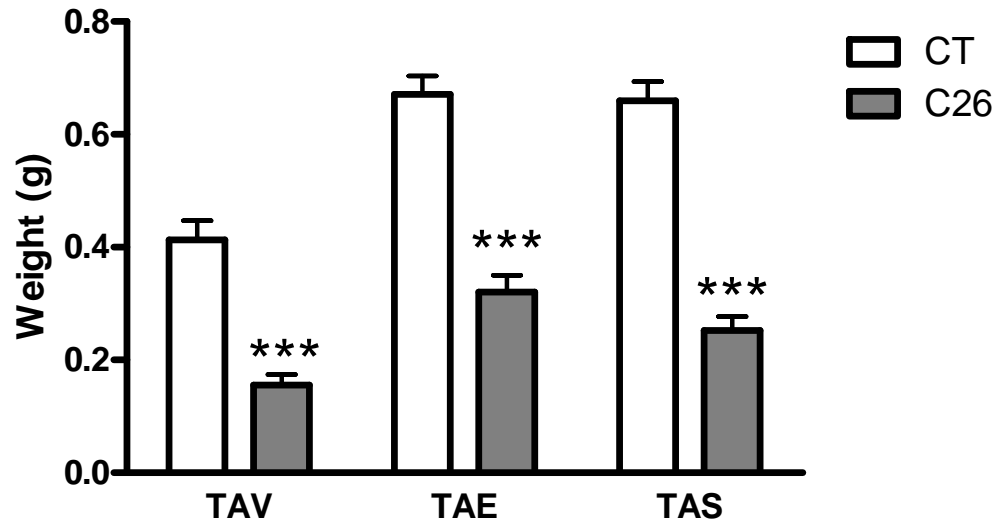**C****Muscles**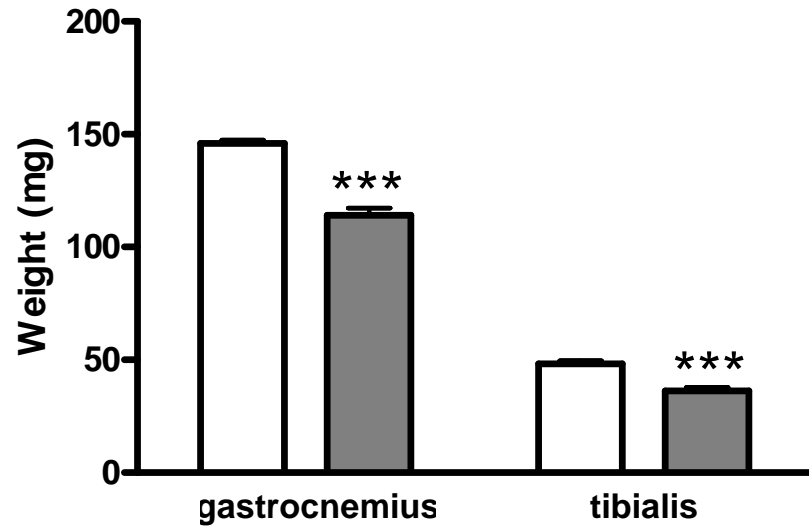**D****LC3**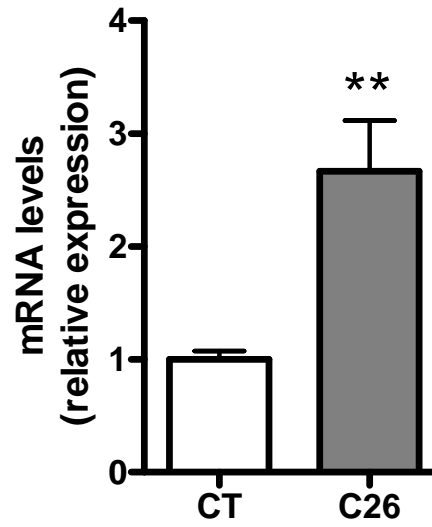**E****Cathepsin L**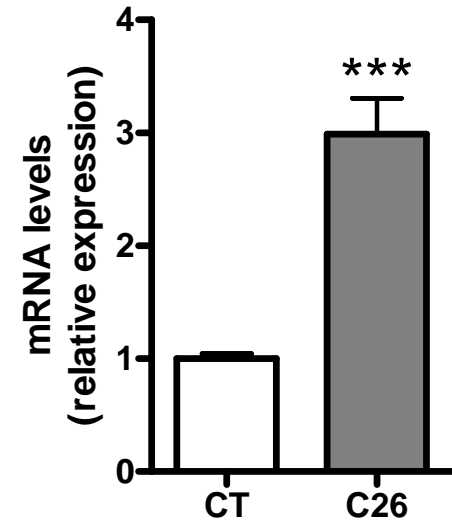

Supplement: ismej2015209x3.pdf [file ismej2015209x3.pdf]

## BaF model

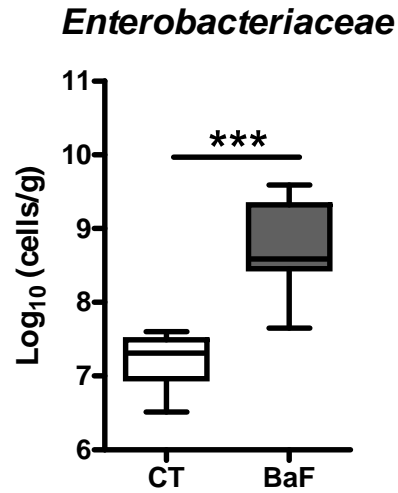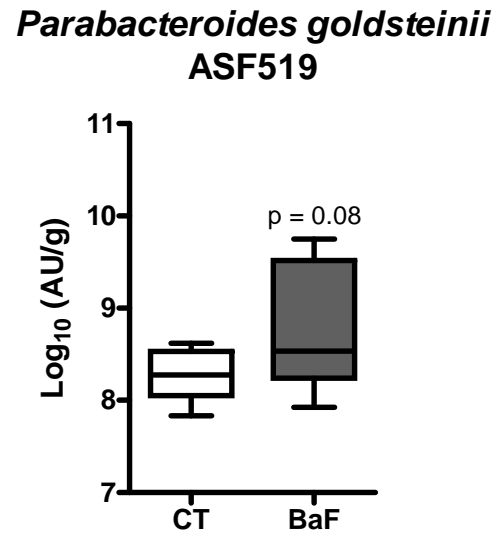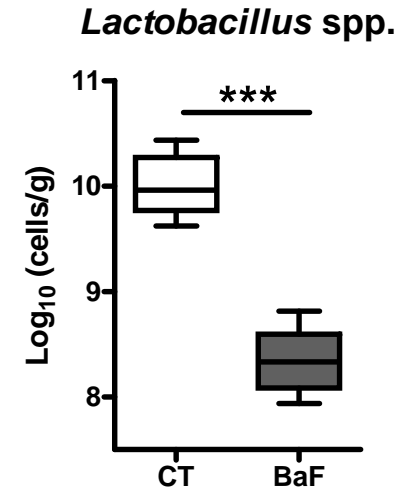

## C26 model

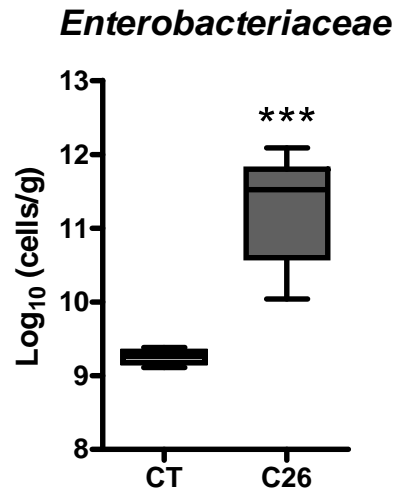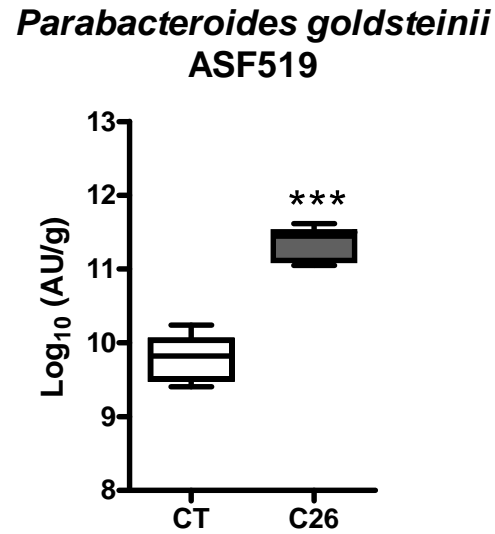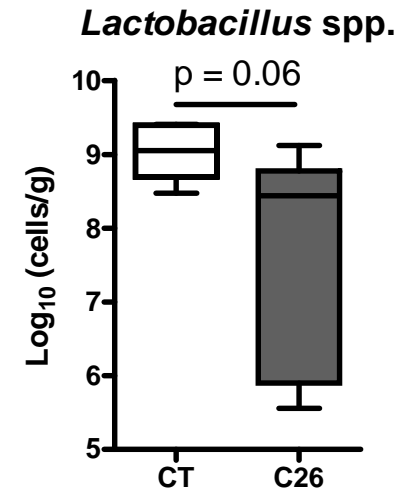

Supplement: ismej2015209x4.pdf [file ismej2015209x4.pdf]

**A**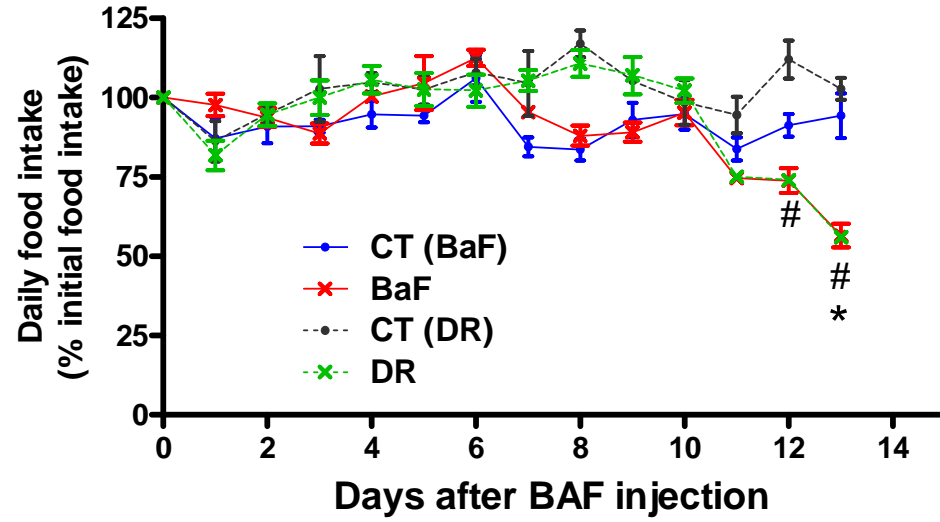**B**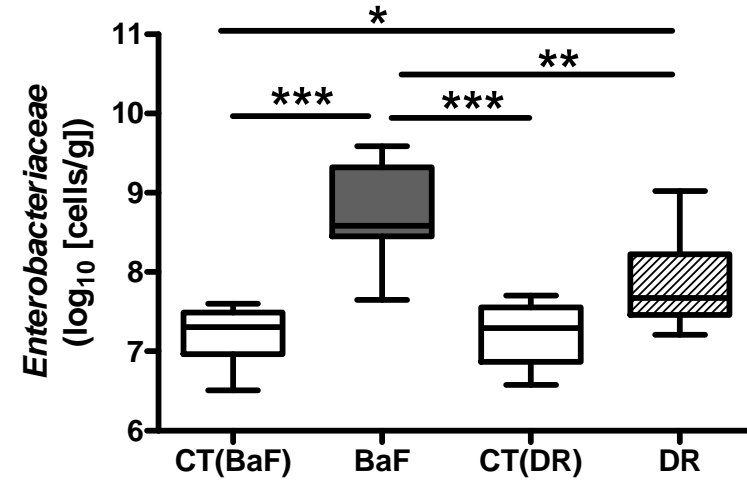**C**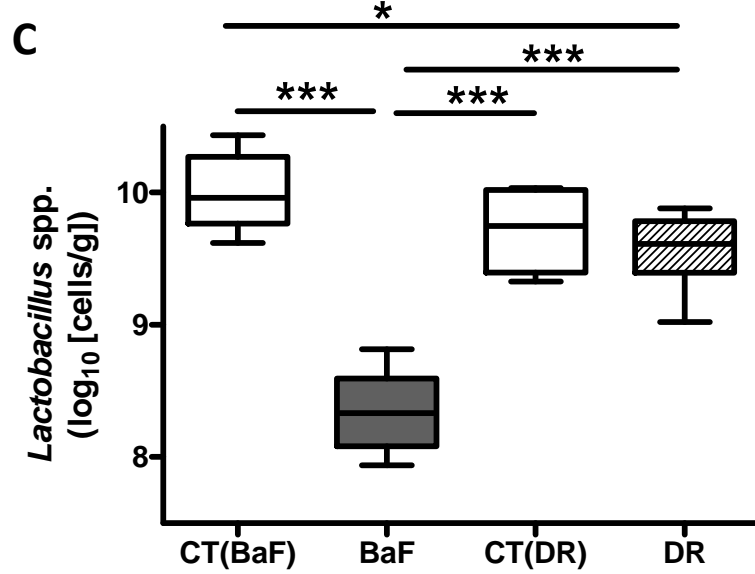**D**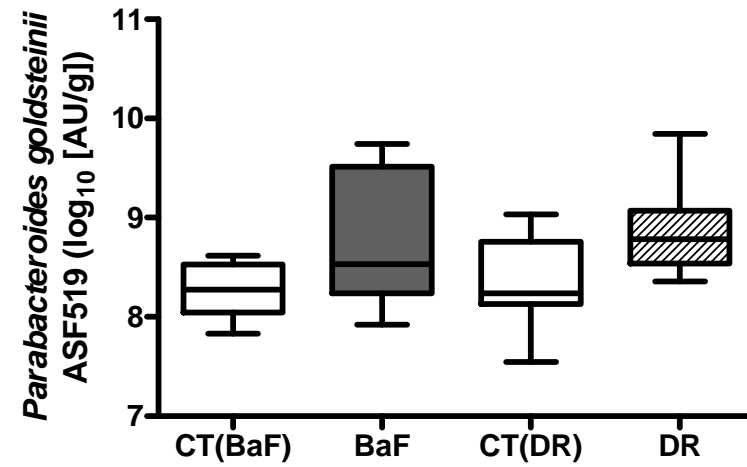

Supplement: ismej2015209x5.pdf [file ismej2015209x5.pdf]

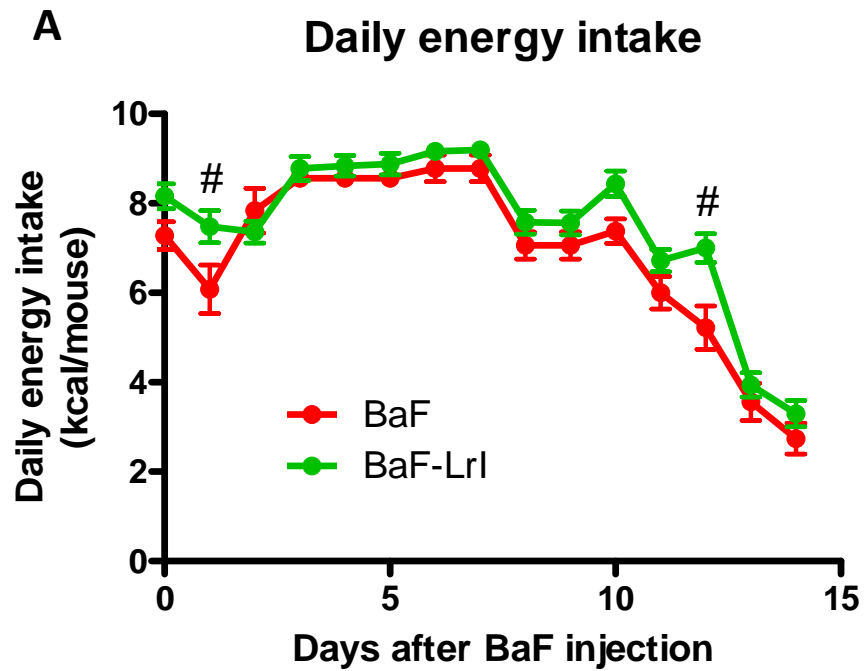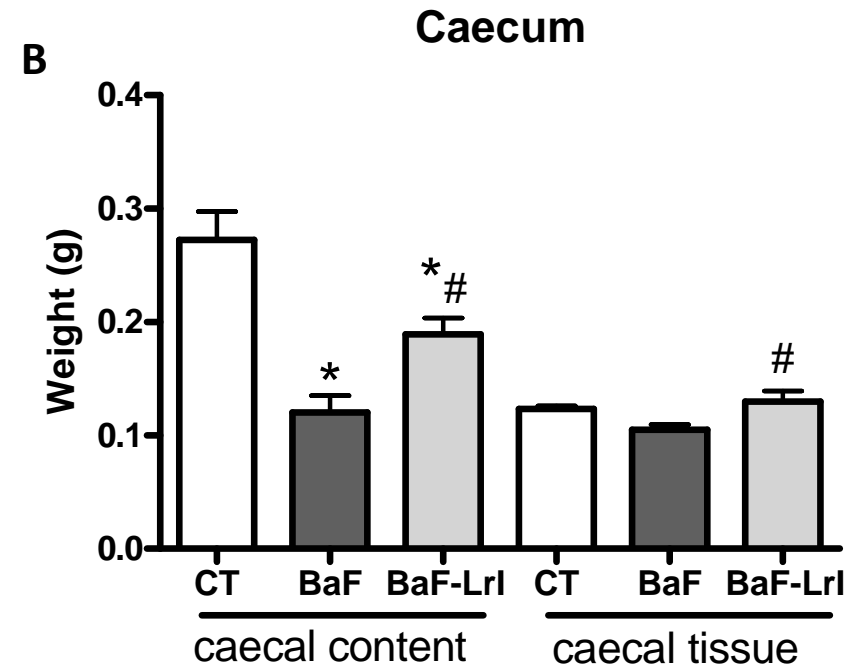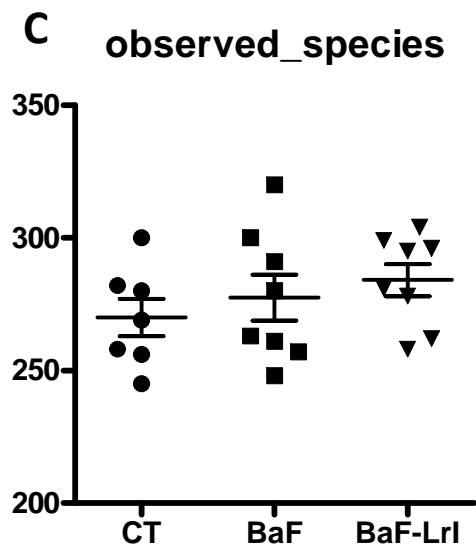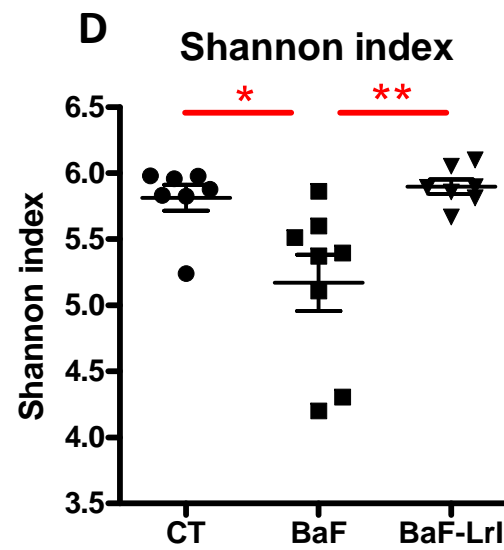

Supplement: ismej2015209x6.pdf [file ismej2015209x6.pdf]

**A**
■ BaF
 ■ control
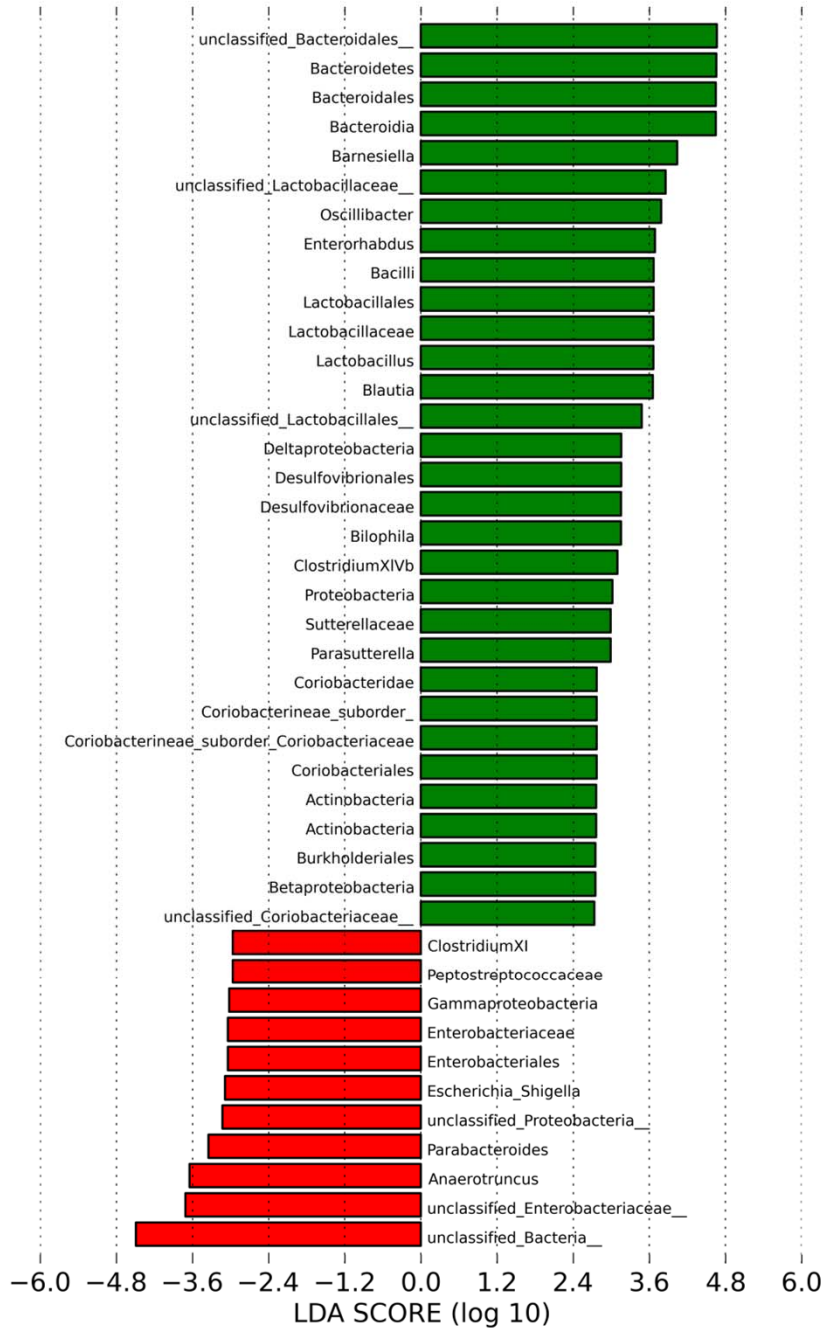**B**
■ BaF
 ■ BaF-LrI
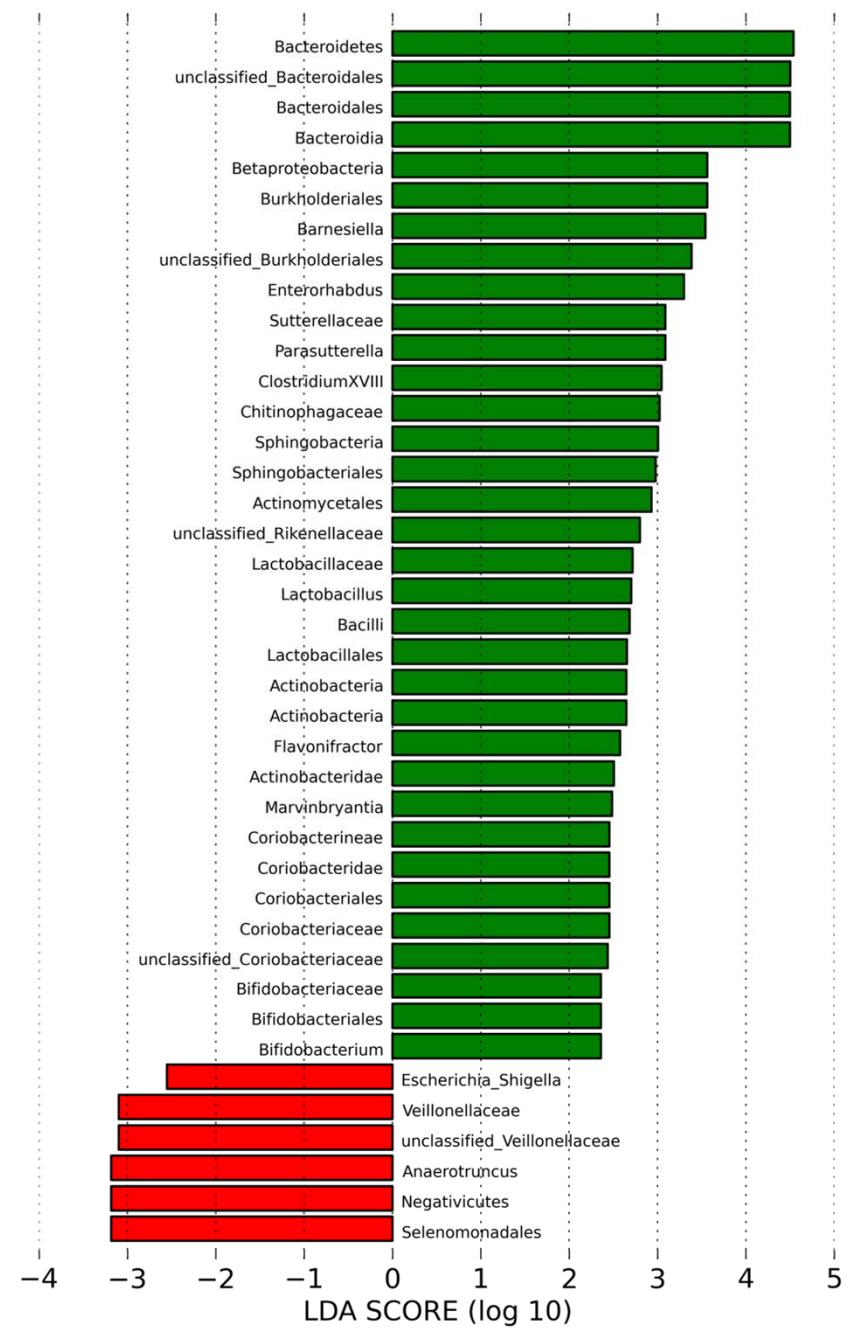

Supplement: ismej2015209x7.pdf [file ismej2015209x7.pdf]
